# Supplementary material for: Δ133p53α and Δ160p53α isoforms of the tumor suppressor protein p53 exert dominant-negative effect primarily by co-aggregation
Source: eLife journal article supplement (doi:10.7554/elife.106469), 2025-04-17
Supplement: fig6-figsupp2-data2 [file elife-106469-fig6-figsupp2-data2-v1.zip]

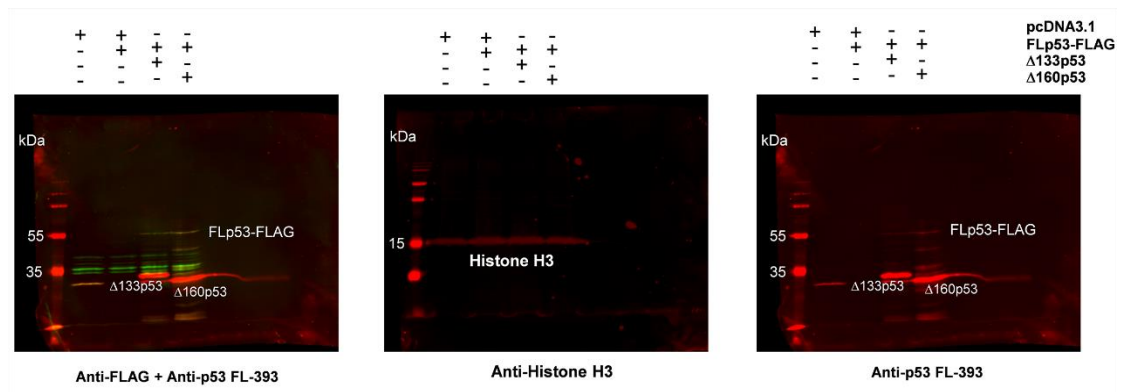

Figure 6-figure supplement 2-source data 2. Original membranes corresponding to Figure 6-figure supplement 2, panel B.
