# Supplementary material for: Δ133p53α and Δ160p53α isoforms of the tumor suppressor protein p53 exert dominant-negative effect primarily by co-aggregation
Source: eLife. 2025 Jul 21;14:RP106469. doi: 10.7554/eLife.106469 (PMC12279375; doi:10.7554/eLife.106469)
Supplement: Figure 3—source data 1. [file elife-106469-fig3-data1.xlsx]

## Sheet: Figure 3-source data 1
	Figure 3—source data 1. ChIP-qPCR assay data corresponding to Figure 3, panels B and C.
	Promoter	ChIP	Sample		Input normalized	% Input	NIS/Mock adjusted	Fold Enrichment
	Target Site	Sample	Fraction	Ct	IP value (∆Ct)	Sites IP'ed	IP Ct value (∆∆Ct)	above bkgrnd (beads)
	(ChIP-qPCR Assay)	ID	(Template)		(Ct[IP]-Ct[InputxDF])	((2-∆Ct)x100%)	(∆Ct[IP]-∆Ct[beads])	(2-∆∆Ct)
	p21 promoter-5`RE	pcDNA3.1	Input	25.563
		pcDNA3.1	Input	25.9165
		pcDNA3.1	Input	25.4884
		FLp53	Input	25.4907
		FLp53	Input	25.8796
		FLp53	Input	26.0454
		Δ133p53	Input	25.6211
		Δ133p53	Input	25.086
		Δ133p53	Input	25.4812
		Δ160p53	Input	26.1797
		Δ160p53	Input	26.4278
		Δ160p53	Input	26.2309
		FLp53+pcDNA3.1	Input	26.5629
		FLp53+pcDNA3.1	Input	26.5629
		FLp53+pcDNA3.1	Input	25.7402
		FLp53 + Δ133p53	Input	26.1123
		FLp53 + Δ133p53	Input	26.6025
		FLp53 + Δ133p53	Input	26.0823
		FLp53 + Δ160p53	Input	26.8881
		FLp53 + Δ160p53	Input	26.8588
		FLp53 + Δ160p53	Input	Undetermined
									Average	StDev
		pcDNA3.1	ChIP	31.7429	12.8238		0	1	1.00804	0.0402417
		pcDNA3.1	ChIP	32.1367	12.8642		0.0403385	0.972427
		pcDNA3.1	ChIP	31.5955	12.7511		-0.0727177	1.0517
		FLp53	ChIP	25.8427	6.99602		-5.82783	56.8003	57.7187	2.64281
		FLp53	ChIP	26.1358	6.90026		-5.92358	60.6982
		FLp53	ChIP	26.4267	7.02534		-5.79851	55.6576
		Δ133p53	ChIP	29.8492	10.8721		-1.95176	3.86846	2.8419	1.27582
		Δ133p53	ChIP	30.7666	12.3245		-0.499319	1.41355
		Δ133p53	ChIP	29.9634	11.1262		-1.69763	3.24368
		Δ160p53	ChIP	30.236	10.7003		-2.12356	4.35767	5.37879	0.912603
		Δ160p53	ChIP	30.1059	10.3221		-2.50179	5.66387
		Δ160p53	ChIP	30.0471	10.2115		-2.61231	6.11482
		FLp53+pcDNA3.1	ChIP	26.3333	6.41443		-6.40942	85.0015	84.8935	3.84607
		FLp53+pcDNA3.1	ChIP	26.403	6.48409		-6.33975	80.9946
		FLp53+pcDNA3.1	ChIP	25.4495	6.35324		-6.47061	88.6845
		FLp53 + Δ133p53	ChIP	26.7119	7.24364		-5.5802	47.8419	55.925	8.30357
		FLp53 + Δ133p53	ChIP	26.7727	6.81412		-6.00972	64.4327
		FLp53 + Δ133p53	ChIP	26.4677	7.02942		-5.79443	55.5005
		FLp53 + Δ160p53	ChIP	27.4808	7.23675		-5.5871	48.0711	49.815	2.46633
		FLp53 + Δ160p53	ChIP	27.3505	7.13569		-5.68815	51.559
		FLp53 + Δ160p53	ChIP	26.9168
	Promoter	ChIP	Sample		Input normalized	% Input	NIS/Mock adjusted	Fold Enrichment
	Target Site	Sample	Fraction	Ct	IP value (∆Ct)	Sites IP'ed	IP Ct value (∆∆Ct)	above bkgrnd (beads)
	(ChIP-qPCR Assay)	ID	(Template)		(Ct[IP]-Ct[InputxDF])	((2-∆Ct)x100%)	(∆Ct[IP]-∆Ct[beads])	(2-∆∆Ct)
	MDM2 promoter	pcDNA3.1	Input	25.6805
		pcDNA3.1	Input	26.3176
		pcDNA3.1	Input	25.3603
		FLp53	Input	25.187
		FLp53	Input	25.3048
		FLp53	Input	24.9341
		Δ133p53	Input	25.8106
		Δ133p53	Input	25.424
		Δ133p53	Input	25.4622
		Δ160p53	Input	26.1218
		Δ160p53	Input	26.0958
		Δ160p53	Input	26.423
									Average	StDev
		pcDNA3.1	ChIP	30.9588	11.9223		0	1	1.02733	0.366421
		pcDNA3.1	ChIP	31.1036	11.43		-0.49227	1.40666
		pcDNA3.1	ChIP	31.2049	12.4886		0.566303	0.675345
		FLp53	ChIP	24.9297	6.63956		-5.28274	38.9282	40.8291	2.68836
		FLp53	ChIP	25.9789	7.31805		-4.60426
		FLp53	ChIP	25.0481	6.50513		-5.41718	42.7301
		Δ133p53	ChIP	30.5381	11.3715		-0.550791	1.46489	1.54334	0.131297
		Δ133p53	ChIP	30.1463	11.3663		-0.556034	1.47022
		Δ133p53	ChIP	29.9792	11.1611		-0.761219	1.69492
		Δ160p53	ChIP	29.6513	10.1735		-1.74883	3.36086	2.83777	0.567389
		Δ160p53	ChIP	30.2141	10.7623		-1.16001	2.23459
		Δ160p53	ChIP	30.1564	10.3774		-1.54491	2.91787
	Promoter	ChIP	Sample		Input normalized	% Input	NIS/Mock adjusted	Fold Enrichment
	Target Site	Sample	Fraction	Ct	IP value (∆Ct)	Sites IP'ed	IP Ct value (∆∆Ct)	above bkgrnd (beads)
	(ChIP-qPCR Assay)	ID	(Template)		(Ct[IP]-Ct[InputxDF])	((2-∆Ct)x100%)	(∆Ct[IP]-∆Ct[beads])	(2-∆∆Ct)
	MDM2 promoter	pcDNA3.1	Input	24.6106
		pcDNA3.1	Input	24.7267
		pcDNA3.1	Input	23.888
		FLp53+pcDNA3.1	Input	25.235
		FLp53+pcDNA3.1	Input	24.5485
		FLp53+pcDNA3.1	Input	25.6339
		FLp53 + Δ133p53	Input	24.8298
		FLp53 + Δ133p53	Input	25.1231
		FLp53 + Δ133p53	Input	25.9084
		FLp53 + Δ160p53	Input	25.7605
		FLp53 + Δ160p53	Input	24.7691
		FLp53 + Δ160p53	Input	25.1978
									Average	StDev
		pcDNA3.1	ChIP	31.3285	13.3619		0	1	1.03309	0.0579332
		pcDNA3.1	ChIP	31.3071	13.2244		-0.137489	1.09999
		pcDNA3.1	ChIP	30.6069	13.363		0.00101662	0.999296
		FLp53+pcDNA3.1	ChIP	26.4676	7.87664		-5.48529	44.7958	43.4621	8.47538
		FLp53+pcDNA3.1	ChIP	26.1622	8.25764		-5.10429	34.399
		FLp53+pcDNA3.1	ChIP	26.674	7.6841		-5.67784	51.1916
		FLp53 + Δ133p53	ChIP	26.7569	8.57108		-4.79085	27.6815	31.013	4.71143
		FLp53 + Δ133p53	ChIP	26.739	8.25993		-5.10201	34.3445
		FLp53 + Δ133p53	ChIP	26.7403	7.47586		-5.88608
		FLp53 + Δ160p53	ChIP	27.186	8.06958		-5.29236	39.1885	33.6838	7.95526
		FLp53 + Δ160p53	ChIP	26.8686	8.74353		-4.6184	24.5628
		FLp53 + Δ160p53	ChIP	26.6947	8.14082		-5.22111	37.3002
	Promoter	ChIP	Sample		Input normalized	% Input	NIS/Mock adjusted	Fold Enrichment
	Target Site	Sample	Fraction	Ct	IP value (∆Ct)	Sites IP'ed	IP Ct value (∆∆Ct)	above bkgrnd (beads)
	(ChIP-qPCR Assay)	ID	(Template)		(Ct[IP]-Ct[InputxDF])	((2-∆Ct)x100%)	(∆Ct[IP]-∆Ct[beads])	(2-∆∆Ct)
	BAX promoter	pcDNA3.1	Input	28.3326
		pcDNA3.1	Input	28.1415
		pcDNA3.1	Input	28.2293
		FLp53	Input	27.8897
		FLp53	Input	29.167
		FLp53	Input	28.0674
		Δ133p53	Input	25.6215
		Δ133p53	Input	25.6657
		Δ133p53	Input	25.2808
		Δ160p53	Input	26.3183
		Δ160p53	Input	25.434
		Δ160p53	Input	25.384
									Average	StDev
		pcDNA3.1	ChIP	34.842	13.1534		0	1	0.947802	0.15557
		pcDNA3.1	ChIP	35.0226	13.5251		0.37175	0.772845
		pcDNA3.1	ChIP	34.6403	13.055		-0.0983658	1.07056
		FLp53	ChIP	30.5813	9.33563		-3.81773	14.101	14.2942	0.273174
		FLp53	ChIP	30.2519	7.72884		-5.42452
		FLp53	ChIP	30.7201	9.29664		-3.85672	14.4874
		Δ133p53	ChIP	32.0744	13.0969		-0.056448	1.0399	0.970348	0.225321
		Δ133p53	ChIP	31.9701	12.9484		-0.205006	1.15269
		Δ133p53	ChIP	32.2672	13.6304		0.477039	0.71845
		Δ160p53	ChIP	31.289	11.6147		-1.53864	2.90521	1.74977	1.00567
		Δ160p53	ChIP	31.8434	13.0535		-0.0998859	1.07169
		Δ160p53	ChIP	31.5458	12.8058		-0.347553	1.2724
	Promoter	ChIP	Sample		Input normalized	% Input	NIS/Mock adjusted	Fold Enrichment
	Target Site	Sample	Fraction	Ct	IP value (∆Ct)	Sites IP'ed	IP Ct value (∆∆Ct)	above bkgrnd (beads)
	(ChIP-qPCR Assay)	ID	(Template)		(Ct[IP]-Ct[InputxDF])	((2-∆Ct)x100%)	(∆Ct[IP]-∆Ct[beads])	(2-∆∆Ct)
	BAX promoter	pcDNA3.1	Input	27.3751
		pcDNA3.1	Input	27.4845
		pcDNA3.1	Input	28.0384
		FLp53+pcDNA3.1	Input	27.8646
		FLp53+pcDNA3.1	Input	28.0196
		FLp53+pcDNA3.1	Input	28.0918
		FLp53 + Δ133p53	Input	27.7181
		FLp53 + Δ133p53	Input	27.9883
		FLp53 + Δ133p53	Input	28.179
		FLp53 + Δ160p53	Input	28.8799
		FLp53 + Δ160p53	Input	29.1047
		FLp53 + Δ160p53	Input	29.064
									Average	StDev
		pcDNA3.1	ChIP	28.9515	8.22041		0	1	1.19514	0.196432
		pcDNA3.1	ChIP	28.8068	7.96632		-0.254086	1.19258
		pcDNA3.1	ChIP	29.1367	7.74238		-0.478029	1.39284
		FLp53+pcDNA3.1	ChIP	26.7163	5.49573		-2.72468	6.61013	5.55313	0.916329
		FLp53+pcDNA3.1	ChIP	27.2551	5.87952		-2.34089	5.06617
		FLp53+pcDNA3.1	ChIP	27.3512	5.90337		-2.31704	4.98309
		FLp53 + Δ133p53	ChIP	26.7721	5.69796		-2.52245	5.74556	5.98924	0.215374
		FLp53 + Δ133p53	ChIP	26.9432	5.59886		-2.62155	6.15412
		FLp53 + Δ133p53	ChIP	27.1542	5.61918		-2.60123	6.06803
		FLp53 + Δ160p53	ChIP	27.9845	5.74864		-2.47177	5.54723	5.17599	0.96395
		FLp53 + Δ160p53	ChIP	28.1206	5.65991		-2.5605	5.89913
		FLp53 + Δ160p53	ChIP	28.6112	6.19127		-2.02914	4.08162
	Promoter	ChIP	Sample		Input normalized	% Input	NIS/Mock adjusted	Fold Enrichment
	Target Site	Sample	Fraction	Ct	IP value (∆Ct)	Sites IP'ed	IP Ct value (∆∆Ct)	above bkgrnd (beads)
	(ChIP-qPCR Assay)	ID	(Template)		(Ct[IP]-Ct[InputxDF])	((2-∆Ct)x100%)	(∆Ct[IP]-∆Ct[beads])	(2-∆∆Ct)
	PUMA promoter	pcDNA3.1	Input	30.0743
		pcDNA3.1	Input	29.3833
		pcDNA3.1	Input	30.1877
		FLp53	Input	29.3435
		FLp53	Input	29.6415
		FLp53	Input	29.6415
		Δ133p53	Input	28.8492
		Δ133p53	Input	28.574
		Δ133p53	Input	28.9031
		Δ160p53	Input	28.8636
		Δ160p53	Input	29.2991
		Δ160p53	Input	29.1867
									Average	StDev
		pcDNA3.1	ChIP	34.2011	10.7708		0	1	0.93636	0.165197
		pcDNA3.1	ChIP	33.9274	11.1881		0.417332	0.748808
		pcDNA3.1	ChIP	34.2301	10.6863		-0.0844345	1.06027
		FLp53	ChIP	31.4607	8.76123		-2.00954	4.02654	3.25851	0.789167
		FLp53	ChIP	32.4757	9.47812		-1.29265	2.44978
		FLp53	ChIP	32.0462	9.04866		-1.72211	3.2992
		Δ133p53	ChIP	33.7783	11.5731		0.802376	0.573404	0.466525	0.107499
		Δ133p53	ChIP	34.1811	12.2511		1.48029	0.358417
		Δ133p53	ChIP	34.1261	11.8669		1.09618	0.467755
		Δ160p53	ChIP	33.822	11.6024		0.831638	0.561891	0.629153	0.06156
		Δ160p53	ChIP	34.0632	11.4082		0.637392	0.642874
		Δ160p53	ChIP	33.8642	11.3215		0.550686	0.682695
	Promoter	ChIP	Sample		Input normalized	% Input	NIS/Mock adjusted	Fold Enrichment
	Target Site	Sample	Fraction	Ct	IP value (∆Ct)	Sites IP'ed	IP Ct value (∆∆Ct)	above bkgrnd (beads)
	(ChIP-qPCR Assay)	ID	(Template)		(Ct[IP]-Ct[InputxDF])	((2-∆Ct)x100%)	(∆Ct[IP]-∆Ct[beads])	(2-∆∆Ct)
	PUMA promoter	pcDNA3.1	Input	27.9728
		pcDNA3.1	Input	28.2816
		pcDNA3.1	Input	28.7974
		FLp53+pcDNA3.1	Input	29.2606
		FLp53+pcDNA3.1	Input	28.2794
		FLp53+pcDNA3.1	Input	28.3691
		FLp53 + Δ133p53	Input	28.9607
		FLp53 + Δ133p53	Input	28.6729
		FLp53 + Δ133p53	Input	28.1817
		FLp53 + Δ160p53	Input	29.6169
		FLp53 + Δ160p53	Input	28.9255
		FLp53 + Δ160p53	Input	29.1059
									Average	StDev
		pcDNA3.1	ChIP	29.955	8.62619		0	1	1.09604	0.145991
		pcDNA3.1	ChIP	30.2295	8.59187		-0.034317	1.02407
		pcDNA3.1	ChIP	30.4415	8.28815		-0.338041	1.26404
		FLp53+pcDNA3.1	ChIP	29.9583	7.34177		-1.28442	2.43584	2.39671	0.146333
		FLp53+pcDNA3.1	ChIP	28.9284	7.29305		-1.33314	2.5195
		FLp53+pcDNA3.1	ChIP	29.1912	7.46605		-1.16014	2.23479
		FLp53 + Δ133p53	ChIP	29.1776	6.86086		-1.76533	3.39951	2.92393	0.582023
		FLp53 + Δ133p53	ChIP	29.024	6.99515		-1.63104	3.09737
		FLp53 + Δ133p53	ChIP	28.978	7.44039		-1.1858	2.2749
		FLp53 + Δ160p53	ChIP	29.3227	6.34978		-2.27641		3.095	0.231221
		FLp53 + Δ160p53	ChIP	29.3561	7.07455		-1.55164	2.9315
		FLp53 + Δ160p53	ChIP	29.3839	6.92198		-1.70421	3.2585
