# Supplementary material for: Δ133p53α and Δ160p53α isoforms of the tumor suppressor protein p53 exert dominant-negative effect primarily by co-aggregation
Source: eLife. 2025 Jul 21;14:RP106469. doi: 10.7554/eLife.106469 (PMC12279375; doi:10.7554/eLife.106469)
Supplement: Figure 4—source data 1. [file elife-106469-fig4-data1.xlsx]

## Sheet: Figure 4-source data 1
	Figure 4—source data 1. Luciferase reporter assay data corresponding to Figure 4, panels A-D.
	p21-Luc				Normalized to pcDNA3.1			Average	StDev
	pcDNA3.1	921	840	935	1.09643	1	1.1131	1.06984	0.0610557
	D133p53 + pcDNA3.1	1437	1350	1099	1.71071	1.60714	1.30833	1.54206	0.208936
	D160p53 + pcDNA3.1	1414	1301	1002	1.68333	1.54881	1.19286	1.475	0.253432
	FLp53 + pcDNA3.1	22626	23446	17511	26.9357	27.9119	20.8464	25.2313	3.82869
	FLp53 + D133p53 (1:1)	18679	15415	17409	22.2369	18.3512	20.725	20.4377	1.95872
	FLp53 + D133p53 (1:5)	6717	9719	8137	7.99643	11.5702	9.6869	9.75119	1.78777
	FLp53 + D133p53 (1:10)	4157	3693	5314	4.94881	4.39643	6.32619	5.22381	0.993838
	FLp53 + D160p53 (1:1)	16623	14814	15334	19.7893	17.6357	18.2548	18.5599	1.10874
	FLp53 + D160p53 (1:5)	6662	7323	5444	7.93095	8.71786	6.48095	7.70992	1.13471
	FLp53 + D160p53 (1:10)	4675	4813	4088	5.56548	5.72976	4.86667	5.3873	0.458304
	MDM2-Luc
	pcDNA3.1	2141	2113	1900	1.12684	1.11211	1	1.07965	0.0693706
	D133p53 + pcDNA3.1	3762	3617	3420	1.98	1.90368	1.8	1.89456	0.0903461
	D160p53 + pcDNA3.1	3883	3690	3100	2.04368	1.94211	1.63158	1.87246	0.2147
	FLp53 + pcDNA3.1	163424	143723	113408	86.0126	75.6437	59.6884	73.7816	13.2605
	FLp53 + D133p53 (1:1)	129495	140848	138514	68.1553	74.1305	72.9021	71.7293	3.15556
	FLp53 + D133p53 (1:5)	105598	83508	76174	55.5779	43.9516	40.0916	46.5404	8.06119
	FLp53 + D133p53 (1:10)	39450	43256	43191	20.7632	22.7663	22.7321	22.0872	1.14678
	FLp53 + D160p53 (1:1)	123114	136246	100179	64.7968	71.7084	52.7258	63.077	9.60747
	FLp53 + D160p53 (1:5)	71132	54172	66482	37.4379	28.5116	34.9905	33.6467	4.6124
	FLp53 + D160p53 (1:10)	24753	20755	19326	13.0279	10.9237	10.1716	11.3744	1.48054
	Bax-Luc
	pcDNA3.1	652	648	699	1.00617	1	1.0787	1.02829	0.0437666
	D133p53 + pcDNA3.1	420	441	301	0.648148	0.680556	0.464506	0.597737	0.116513
	D160p53 + pcDNA3.1	449	317	353	0.692901	0.489198	0.544753	0.575617	0.105301
	FLp53 + pcDNA3.1	8339	7678	8521	12.8688	11.8488	13.1497	12.6224	0.68457
	FLp53 + D133p53 (1:1)	6686	6551	6296	10.3179	10.1096	9.71605	10.0478	0.305637
	FLp53 + D133p53 (1:5)	4999	4721	4503	7.71451	7.28549	6.94907	7.31636	0.383648
	FLp53 + D133p53 (1:10)	1285	1277	1208	1.98302	1.97068	1.8642	1.9393	0.0653333
	FLp53 + D160p53 (1:1)	6516	6322	6658	10.0556	9.75617	10.2747	10.0288	0.260292
	FLp53 + D160p53 (1:5)	2942	2682	3073	4.54012	4.13889	4.74228	4.47377	0.307122
	FLp53 + D160p53 (1:10)	1710	1506	1566	2.63889	2.32407	2.41667	2.45988	0.161794
	PUMA-Luc
	pcDNA3.1	54148	64284	66693	1	1.18719	1.23168	1.13962	0.122947
	D133p53 + pcDNA3.1	18779	19921	20858	0.346809	0.367899	0.385204	0.366637	0.0192285
	D160p53 + pcDNA3.1	25229	24410	22106	0.465927	0.450802	0.408251	0.44166	0.0299046
	FLp53 + pcDNA3.1	198771	201544	175788	3.67088	3.72209	3.24644	3.54647	0.261097
	FLp53 + D133p53 (1:1)	281508	313123	352179	5.19886	5.78273	6.50401	5.82853	0.653777
	FLp53 + D133p53 (1:5)	258372	254651	199402	4.77159	4.70287	3.68254	4.38567	0.609896
	FLp53 + D133p53 (1:10)	98372	118884	115448	1.81672	2.19554	2.13208	2.04812	0.202886
	FLp53 + D160p53 (1:1)	271286	264388	228527	5.01008	4.88269	4.22041	4.7044	0.423953
	FLp53 + D160p53 (1:5)	137957	138700	156964	2.54778	2.5615	2.8988	2.66936	0.198818
	FLp53 + D160p53 (1:10)	118607	85879	87379	2.19042	1.58601	1.61371	1.79671	0.341245
