# Supplementary material for: Δ133p53α and Δ160p53α isoforms of the tumor suppressor protein p53 exert dominant-negative effect primarily by co-aggregation
Source: eLife. 2025 Jul 21;14:RP106469. doi: 10.7554/eLife.106469 (PMC12279375; doi:10.7554/eLife.106469)
Supplement: Figure 4—source data 2. [file elife-106469-fig4-data2.xlsx]

## Sheet: Figure 4-source data 2
Figure 4—source data 2. Data corresponding to Figure 4, panels E–H, showing the inhibition of FLp53’s transcriptional activity by Δ133p53 and Δ160p53.
	p21-Luc				Normalized to FLp53+ pcDNA3.1(1:1)			Average	StDev
	FLp53 + pcDNA3.1(1:1)	22626	23446	17511	100	103.624	77.3933	93.6725	14.2142
	FLp53 + D133p53 (1:1)	18679	15415	17409	82.5555	68.1296	76.9425	75.8758	7.27185
	FLp53 + D133p53 (1:5)	6717	9719	8137	29.6871	42.955	35.9631	36.2017	6.63718
	FLp53 + D133p53 (1:10)	4157	3693	5314	18.3727	16.3219	23.4863	19.3936	3.68967
	FLp53 + D160p53 (1:1)	17578	15583	16574	77.6894	68.8721	73.252	73.2712	4.40868
	FLp53 + D160p53 (1:5)	6662	7323	5444	29.444	32.3654	24.0608	28.6234	4.21268
	FLp53 + D160p53 (1:10)	4675	4813	4088	20.6621	21.272	18.0677	20.0006	1.70148
	MDM2-Luc
	FLp53 + pcDNA3.1(1:1)	163424	143723	113408	113.708	100	78.9073	97.5383	17.5303
	FLp53 + D133p53 (1:1)	129495	140848	138514	90.1004	97.9996	96.3757	94.8252	4.17161
	FLp53 + D133p53 (1:5)	105598	83508	76174	73.4733	58.1034	53.0006	61.5258	10.6568
	FLp53 + D133p53 (1:10)	39450	43256	43191	27.4486	30.0968	30.0516	29.199	1.51602
	FLp53 + D160p53 (1:1)	123114	136246	100179	85.6606	94.7976	69.7028	83.387	12.701
	FLp53 + D160p53 (1:5)	71132	54172	66482	49.4924	37.6919	46.257	44.4805	6.09754
	FLp53 + D160p53 (1:10)	24753	20755	19326	17.2227	14.441	13.4467	15.0368	1.95725
	Bax-Luc
	FLp53 + pcDNA3.1(1:1)	8339	7678	8521	100	92.0734	102.183	98.0853	5.3196
	FLp53 + D133p53 (1:1)	6686	6551	6296	80.1775	78.5586	75.5007	78.0789	2.37502
	FLp53 + D133p53 (1:5)	4999	4721	4503	59.9472	56.6135	53.9993	56.8533	2.98122
	FLp53 + D133p53 (1:10)	1285	1277	1208	15.4095	15.3136	14.4861	15.0698	0.507686
	FLp53 + D160p53 (1:1)	6516	6322	6658	78.1389	75.8124	79.8417	77.931	2.02266
	FLp53 + D160p53 (1:5)	2942	2682	3073	35.28	32.1621	36.8509	34.7644	2.38656
	FLp53 + D160p53 (1:10)	1710	1506	1566	20.5061	18.0597	18.7792	19.115	1.25726
	PUMA-Luc
					Normalized to FLp53+pcDNA3.1 (1:1)			Normalized to FLp53 + D133p53 (1:1)			Average	StDev
	FLp53 + pcDNA3.1(1:1)	198771	201544	175788	100	101.395	88.4374	63.48	64.3656	56.1401	61.3285	4.51511
	FLp53 + D133p53 (1:1)	281508	313123	352179	141.624	157.53	177.178	89.9031	99.9997	112.473	100.792	11.3057
	FLp53 + D133p53 (1:5)	258372	254651	199402	129.985	128.113	100.317	82.5143	81.3259	63.6815	75.8406	10.5468
	FLp53 + D133p53 (1:10)	98372	118884	115448	49.4901	59.8095	58.0809	31.4163	37.9671	36.8697	35.4177	3.50848
	FLp53 + D160p53 (1:1)	271286	264388	228527	136.482	133.011	114.97	86.6385	84.4356	72.9829	81.3523	7.33135
	FLp53 + D160p53 (1:5)	137957	138700	156964	69.405	69.7788	78.9673	44.0583	44.2956	50.1284	46.1607	3.43813
	FLp53 + D160p53 (1:10)	118607	85879	87379	59.6702	43.205	43.9596	37.8786	27.4265	27.9056	31.0702	5.90109
