# Supplementary material for: Δ133p53α and Δ160p53α isoforms of the tumor suppressor protein p53 exert dominant-negative effect primarily by co-aggregation
Source: eLife. 2025 Jul 21;14:RP106469. doi: 10.7554/eLife.106469 (PMC12279375; doi:10.7554/eLife.106469)
Supplement: Figure 5—source data 2. [file elife-106469-fig5-data2.xlsx]

## Sheet: Figure 5-source data 2
Figure 5-source data 2. Data corresponding to Figure 5, panel B, showing the cytoplasm-to-nucleus ratio of protein levels.
Quantitative bar graph summarizing the cytoplasm-to-nucleus ratio of protein levels.
Fraction		Signal intensity			Average				Signal intensity			Average		/a-Tubulin			Average	cytoplasm-to-nucleus ratio	Normalized to the FLp53 cytoplasm-to-nucleus ratio
Cytoplasm	FLp53-FLAG	46600	49700	49500	48600		Cytoplasm	a-Tubulin	42600	44700	44900	44066.7		1.0939	1.11186	1.10245	1.10273	1.30771	1
	D133p53-FLAG	109000	111000	112000	110667			a-Tubulin	53100	55100	55200	54466.7		2.05273	2.01452	2.02899	2.03208	2.02678	1.54987
	D160p53-FLAG	118000	123000	120000	120333			a-Tubulin	58500	61100	61300	60300		2.01709	2.01309	1.95759	1.99592	1.96155	1.49999
		Signal intensity							Signal intensity			Average		/Histone H3			Average
Nucleus	FLp53-FLAG	64600	65000	66700	65433.3		Nucleus	Histone-H3	72300	81100	79900	77766.7		0.893499	0.80148	0.834793	0.843257
	D133p53-FLAG	98800	106000	103000	102600			Histone-H3	102000	102000	103000	102333		0.968627	1.03922	1	1.00261
	D160p53-FLAG	115000	123000	123000	120333			Histone-H3	111000	123000	121000	118333		1.03604	1	1.01653	1.01752
