# Supplementary material for: Δ133p53α and Δ160p53α isoforms of the tumor suppressor protein p53 exert dominant-negative effect primarily by co-aggregation
Source: eLife. 2025 Jul 21;14:RP106469. doi: 10.7554/eLife.106469 (PMC12279375; doi:10.7554/eLife.106469)
Supplement: Figure 6—figure supplement 2—source data 3. [file elife-106469-fig6-figsupp2-data3.xlsx]

## Sheet: Sheet1
Figure 6-figure supplement 2-source data 3. Data corresponding to Figure 6—figure supplement 2, panel C, showing the levels of the soluble FLp53-FLAG protein in the cytoplasmic and nuclear fractions.
Fraction		Signal intensity			Signal intensity		/a-Tubulin	Normalized to the FLp53-FLAG protein expressing sample
Cytoplasm	FLp53-FLAG	6850	Cytoplasm	a-Tubulin	54200		0.126384	1
	FLp53-FLAG (FLp53-FLAG + D133p53-V5)	10700		a-Tubulin	86300		0.123986	0.981029
	FLp53-FLAG (FLp53-FLAG + D160p53-V5)	5770		a-Tubulin	47000		0.122766	0.971374
							/Histone-H3
Nucleus	FLp53-FLAG	20200	Nucleus	Histone-H3	34500		0.585507	1
	FLp53-FLAG (FLp53-FLAG + D133p53-V5)	15000		Histone-H3	36700		0.408719	0.69806
	FLp53-FLAG (FLp53-FLAG + D160p53-V5)	11200		Histone-H3	39400		0.284264	0.4855
