# Supplementary material for: Δ133p53α and Δ160p53α isoforms of the tumor suppressor protein p53 exert dominant-negative effect primarily by co-aggregation
Source: eLife. 2025 Jul 21;14:RP106469. doi: 10.7554/eLife.106469 (PMC12279375; doi:10.7554/eLife.106469)
Supplement: Figure 6—figure supplement 2—source data 4. [file elife-106469-fig6-figsupp2-data4.xlsx]

## Sheet: Sheet1
Figure 6-figure supplement 2-source data 4. Data corresponding to Figure 6—figure supplement 2, panel D, showing the levels of the FLp53-FLAG protein in the insoluble nuclear fraction relative to the histone H3.
Sample	Signal intensity		Signal intensity	FLp53/Histone H3	Normalize to FLp53/Histone in cells expressing FLp53
FLp53-FLAG	481	Histone H3	228000	0.00210965	1
FLp53-FLAG (FLp53-FLAG + D133p53-V5)	13900	Histone H3	239000	0.058159	27.5681
FLp53-FLAG (FLp53-FLAG + D160p53-V5)	36300	Histone H3	287000	0.126481	59.9535
