# Supplementary material for: Δ133p53α and Δ160p53α isoforms of the tumor suppressor protein p53 exert dominant-negative effect primarily by co-aggregation
Source: eLife. 2025 Jul 21;14:RP106469. doi: 10.7554/eLife.106469 (PMC12279375; doi:10.7554/eLife.106469)
Supplement: Figure 6—source data 3. [file elife-106469-fig6-data3.xlsx]

## Sheet: Figure6-source data 3
Figure 6-source data 3. Data corresponding to Figure 6, panel C, showing the levels of the soluble FLp53-FLAG protein in the cytoplasmic and nuclear fractions.
Quantitative bar graph summarizing the levels of the soluble FLp53-FLAG protein in the cytoplasmic and nuclear fractions.
Fraction		Signal intensity					Signal intensity				/a-Tubulin			Average		Normalized to the FLp53-FLAG protein expressing sample
Cytoplasm	FLp53-FLAG	123000	124000	124000	Cytoplasm	a-Tubulin	103000	103000	103000		1.19417	1.20388	1.20388	1.20065		1
	FLp53-FLAG (FLp53-FLAG + D133p53-V5)	81800	81300	81700		a-Tubulin	80400	80500	80500		1.01741	1.00994	1.01491	1.01409		0.844616
	FLp53-FLAG (FLp53-FLAG + D160p53-V5)	73300	73400	73400		a-Tubulin	71800	71700	71800		1.02089	1.02371	1.02228	1.0223		0.851453
		Signal intensity					Signal intensity				/Histone-H3
Nucleus	FLp53-FLAG	146000	146000	147000	Nucleus	Histone-H3	67600	64800	64700		2.15976	2.25309	2.27202	2.22829		1
	FLp53-FLAG (FLp53-FLAG + D33p53-V5)	82700	81800	82700		Histone-H3	79200	86200	83200		1.04419	0.948956	0.99399	0.995713		0.44685
	FLp53-FLAG (FLp53-FLAG + D160p53-V5)	123000	124000	123000		Histone-H3	92900	97000	93000		1.324	1.27835	1.32258	1.30831		0.587137
