# Supplementary material for: Δ133p53α and Δ160p53α isoforms of the tumor suppressor protein p53 exert dominant-negative effect primarily by co-aggregation
Source: eLife. 2025 Jul 21;14:RP106469. doi: 10.7554/eLife.106469 (PMC12279375; doi:10.7554/eLife.106469)
Supplement: Figure 6—source data 4. [file elife-106469-fig6-data4.xlsx]

## Sheet: Figure 6-source data 4
Figure 6-source data 4.Data corresponding to Figure 6, panel D, showing the levels of the FLp53-FLAG protein in the insoluble nuclear fraction relative to the histone H3.
Sample		Signal intensity					Signal intensity				FLp53/Histone H3			Average	Normalize to FLp53/Histone in cells expressing FLp53
#1	FLp53-FLAG	22100	26500	27500		Histone H3	50700	57800	57600		0.435897	0.458478	0.477431	0.457269	1
	FLp53-FLAG (FLp53-FLAG + D133p53-V5)	101000	101000	93800		Histone H3	95300	102000	103000		1.05981	0.990196	0.91068	0.986896	2.15824
	FLp53-FLAG (FLp53-FLAG + D160p53-V5)	131000	145000	138000		Histone H3	140000	135000	131000		0.935714	1.07407	1.05344	1.02107	2.23299
#2	FLp53-FLAG	19900	18300	17200		Histone H3	147000	141000	140000		0.135374	0.129787	0.122857	0.12934	1
	FLp53-FLAG (FLp53-FLAG + D133p53-V5)	36400	40400	40600		Histone H3	116000	134000	123000		0.313793	0.301493	0.330081	0.315122	2.4364
	FLp53-FLAG (FLp53-FLAG + D160p53-V5)	39100	38900	39000		Histone H3	108000	112000	116000		0.362037	0.347321	0.336207	0.348522	2.69463
#3	FLp53-FLAG	11000	9180	9300		Histone H3	64400	68200	67700		0.170807	0.134604	0.137371	0.147594	1
	FLp53-FLAG (FLp53-FLAG + D133p53-V5)	27000	25300	25000		Histone H3	80800	84400	86700		0.334158	0.299763	0.288351	0.307424	2.0829
	FLp53-FLAG (FLp53-FLAG + D160p53-V5)	45000	45300	44900		Histone H3	84100	83200	85000		0.535077	0.544471	0.528235	0.535928	3.63109
