# Supplementary material for: Δ133p53α and Δ160p53α isoforms of the tumor suppressor protein p53 exert dominant-negative effect primarily by co-aggregation
Source: eLife. 2025 Jul 21;14:RP106469. doi: 10.7554/eLife.106469 (PMC12279375; doi:10.7554/eLife.106469)
Supplement: Figure 7—source data 1. [file elife-106469-fig7-data1.xlsx]

## Sheet: Figure 7-source data 1
Figure 7—source data 1.Data corresponding to Figure 7, showing caspase-3 and -7 activities of H1299 cells co-transfected with plasmid expressing FLp53 and either Δ133p53 or Δ160p53 at a 1:5 ratio.
		Luminescence
					Average
	Blank (cell culture medium without cells)	116489	142669	146760	135306
					-135306			Normalized to pcDNA3.1			Average	StDev
	pcDNA 3.1	300569	388124	323869	165263	252818	188563	0.876434	1.34076	1	1.0724	0.240481
	FLp53-FLAG/pcDNA3.1 (1:5)	656482	668045	705020	521176	532739	569714	2.76394	2.82526	3.02135	2.87018	0.134456
	FLp53-FLAG / Δ133p53-FLAG (1:5)	403313	460056	346334	268007	324750	211028	1.42131	1.72224	1.11914	1.4209	0.301549
	pcDNA3.1/Δ133p53-FLAG (1:5)	410335	402794	410209	275029	267488	274903	1.45855	1.41856	1.45788	1.445	0.0228989
	FLp53-FLAG / Δ160p53-FLAG (1:5)	476246	521853	526380	340940	386547	391074	1.8081	2.04996	2.07397	1.97734	0.147063
	pcDNA3.1/Δ160p53-FLAG (1:5)	446108	507867	475336	310802	372561	340030	1.64827	1.97579	1.80327	1.80911	0.16384
	FLp53/pcDNA3.1 (1:5)	650264	605663	663376	514958	470357	528070	2.73096	2.49443	2.8005	2.6753	0.160447
	FLp53 / Δ133p53 (1:5)	367385	389785	409646	232079	254479	274340	1.23078	1.34957	1.4549	1.34508	0.112128
	pcDNA3.1/Δ133p53 (1:5)	358650	345794	374207	223344	210488	238901	1.18445	1.11627	1.26696	1.18923	0.0754543
	FLp53 / Δ160p53 (1:5)	320708	329505	310753	185402	194199	175447	0.983236	1.02989	0.930442	0.981189	0.049755
	pcDNA3.1/Δ160p53 (1:5)	292400	252167	235351	157094	116861	100045	0.833111	0.619745	0.530565	0.661141	0.155463
