# Supplementary figures and images for: Δ133p53α and Δ160p53α isoforms of the tumor suppressor protein p53 exert dominant-negative effect primarily by co-aggregation
Source: eLife journal article supplement (doi:10.7554/elife.106469), 2025-04-17

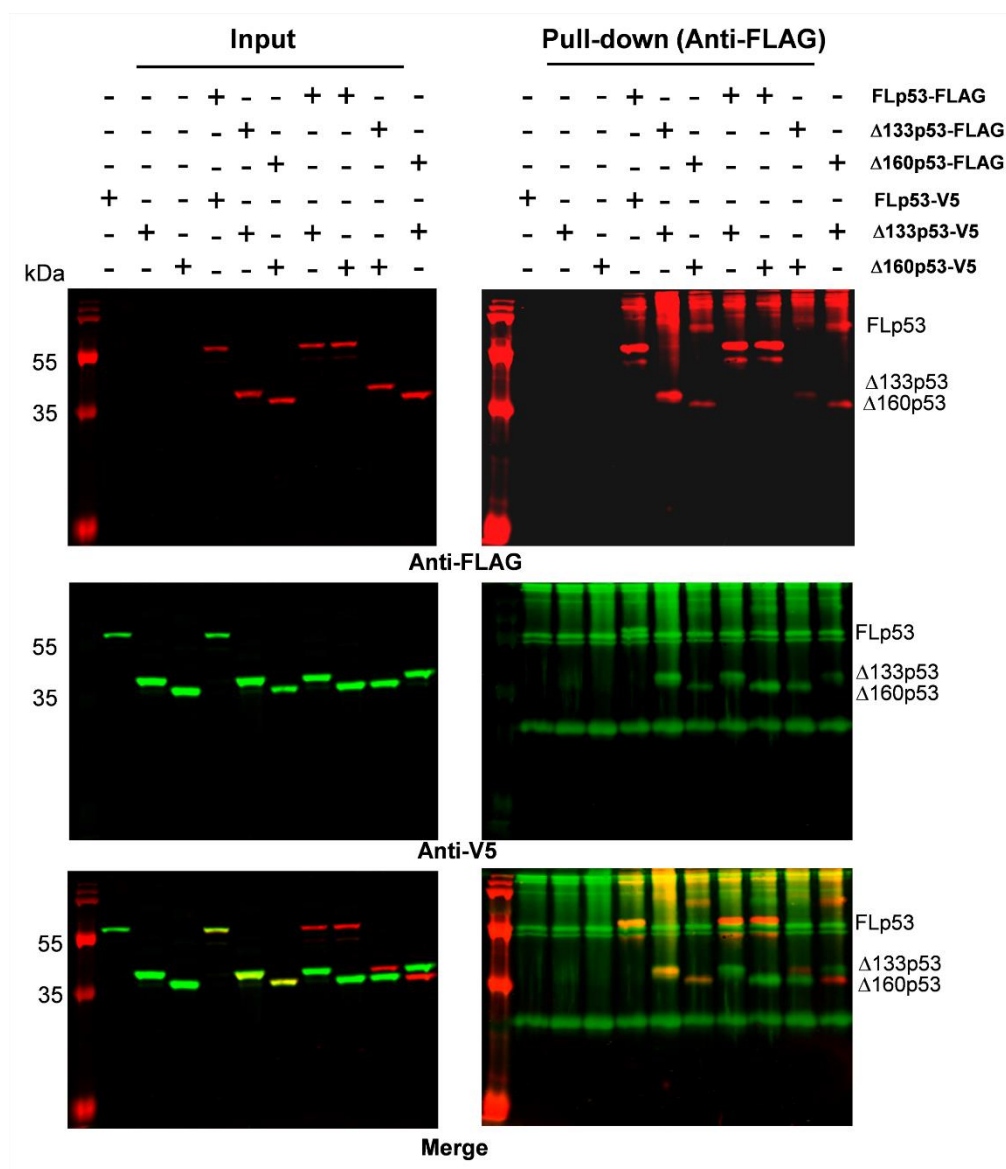

Figure 2-source data 1. Original membranes corresponding to Figure 2, panel A.

Supplement: fig2-data1 [file elife-106469-fig2-data1-v1.zip]

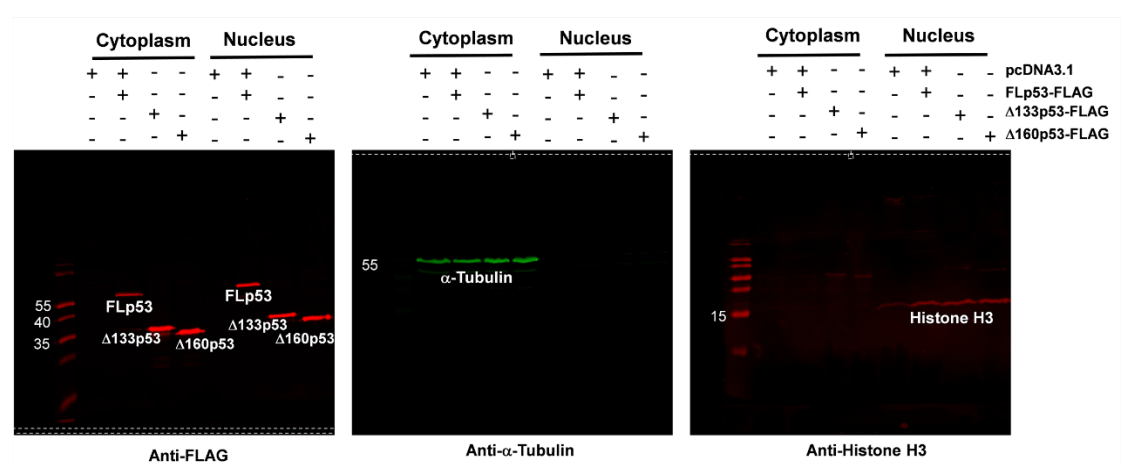

Figure 5-source data1. Original membranes corresponding to Figure 5, panel A.

Supplement: fig5-data1 [file elife-106469-fig5-data1-v1.zip]

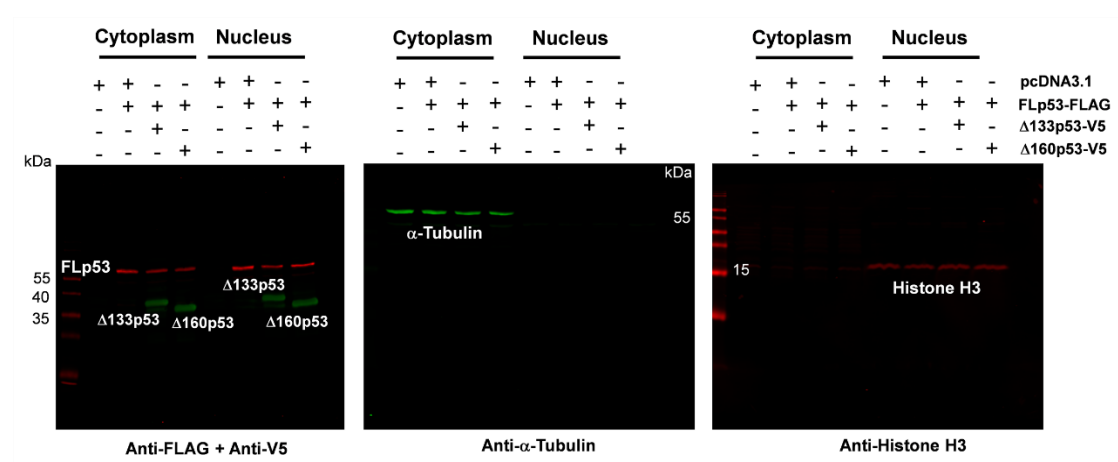

Figure 6-source data 1. Original membranes corresponding to Figure 6, panel A.

Supplement: fig6-data1 [file elife-106469-fig6-data1-v1.zip]

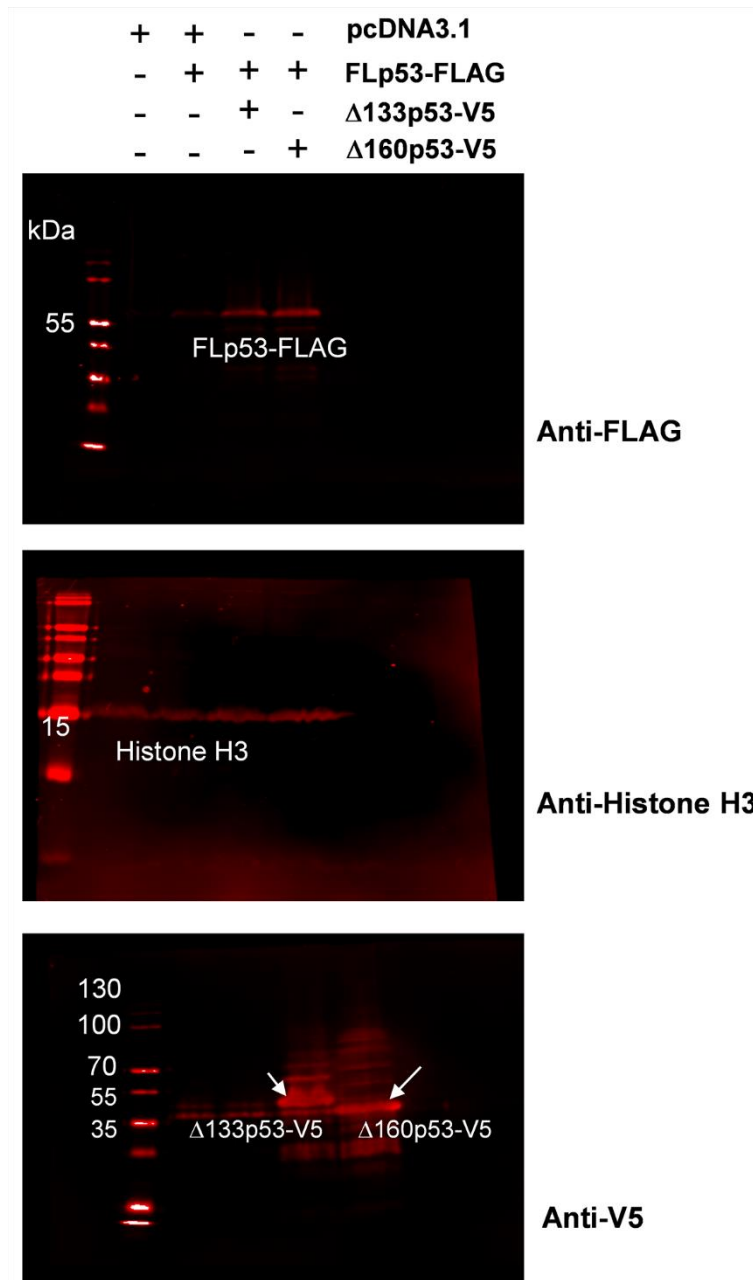

Figure 6-source data 2. Original membranes corresponding to Figure 6, panel B.

Supplement: fig6-data2 [file elife-106469-fig6-data2-v1.zip]
